# Supplementary material for: Data on metabolomic profiling of ovarian cancer patients' serum for potential diagnostic biomarkers
Source: PubMed Central journal article supplement (PMC5998211; doi:10.1016/j.dib.2018.04.081), 2018-04-30
Supplement: mmc1.pdf [file mmc1.pdf]

#### Declaration of interests

KK, MB, RA, AA are employees of a company Universal DX that may in a long term profit from commercially available diagnostic test developed partially on datasets and results published in this study.
